# Supplementary material for: Colorectal Cancer Screening Based on Age and Gender: A Cost-Effectiveness Analysis
Source: PubMed Central journal article supplement (PMC4998853; doi:10.1097/md.0000000000002739), 2016-03-11
Supplement: medi-95-e02739-s001.pdf [file medi-95-e02739-s001.pdf]

**Supplementary Figure 1a One-way sensitivity analysis on the compliance rate of FS**

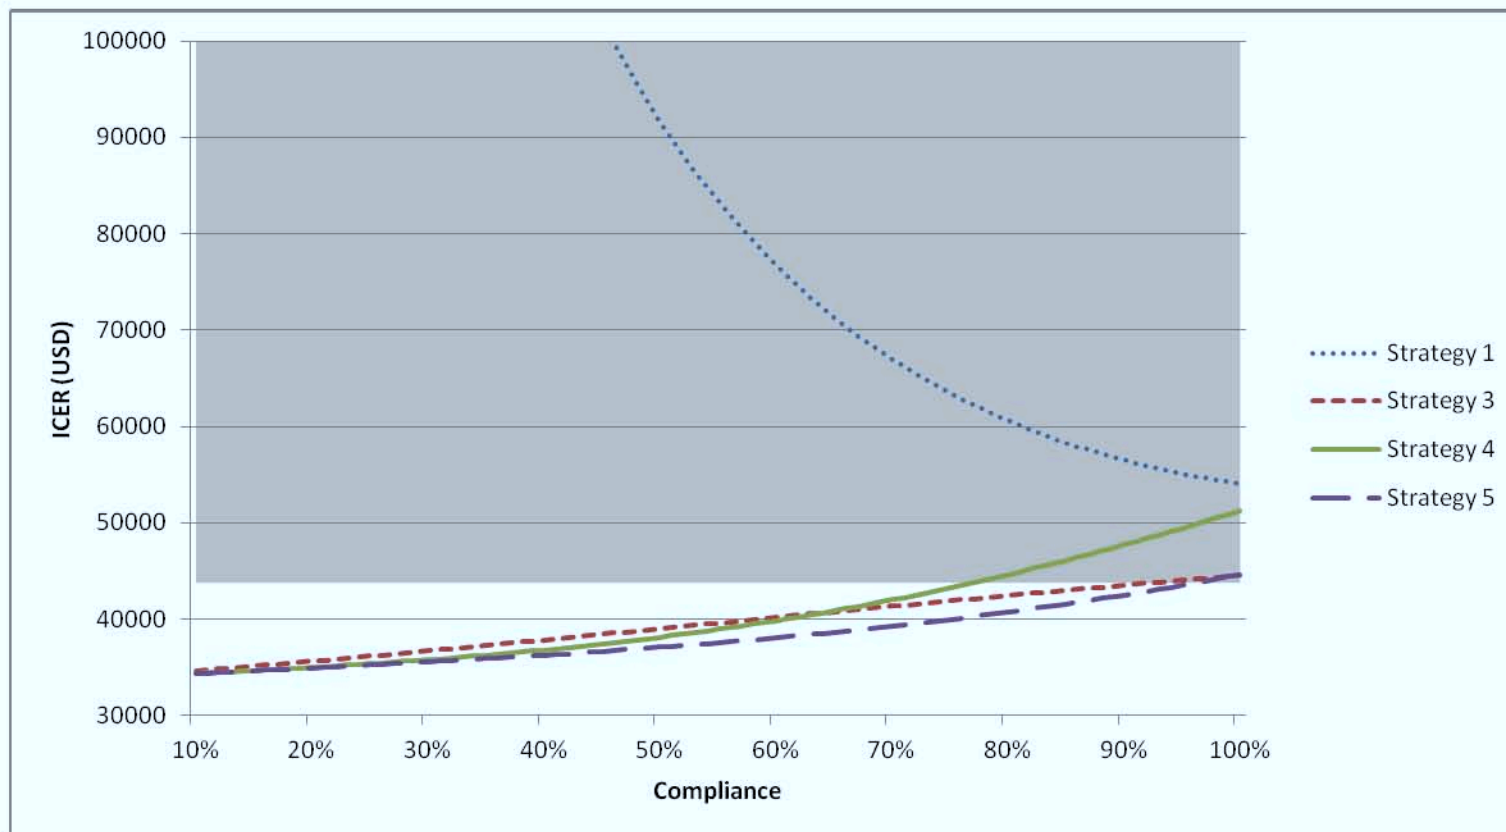

ICER: Incremental Cost-Effectiveness Analysis. Strategy 1: Both male and female subjects received flexible sigmoidoscopy (FS) every 5 years (50, 55, 60, 65 and 70 years); Strategy 2: both male and female subjects received colonoscopy every 10 years (50, 60, 70 years); Strategy 3: FS for each woman at 50 and 55 year-old followed by colonoscopy at 60 and 70 year-old; male subjects received colonoscopy at 50, 60 and 70 year-old; Strategy 4: FS for each woman at 50, 55, 60 and 65 year-old followed by colonoscopy at 70 year-old; male subjects received colonoscopy at 50, 60 and 70 year-old; Strategy 5: FS for each woman at 50, 55, 60, 65 and 70 year-old; male subjects received colonoscopy at 50, 60 and 70 year-old

**Supplementary Figure 1b One-way sensitivity analysis on the specificity of FS**

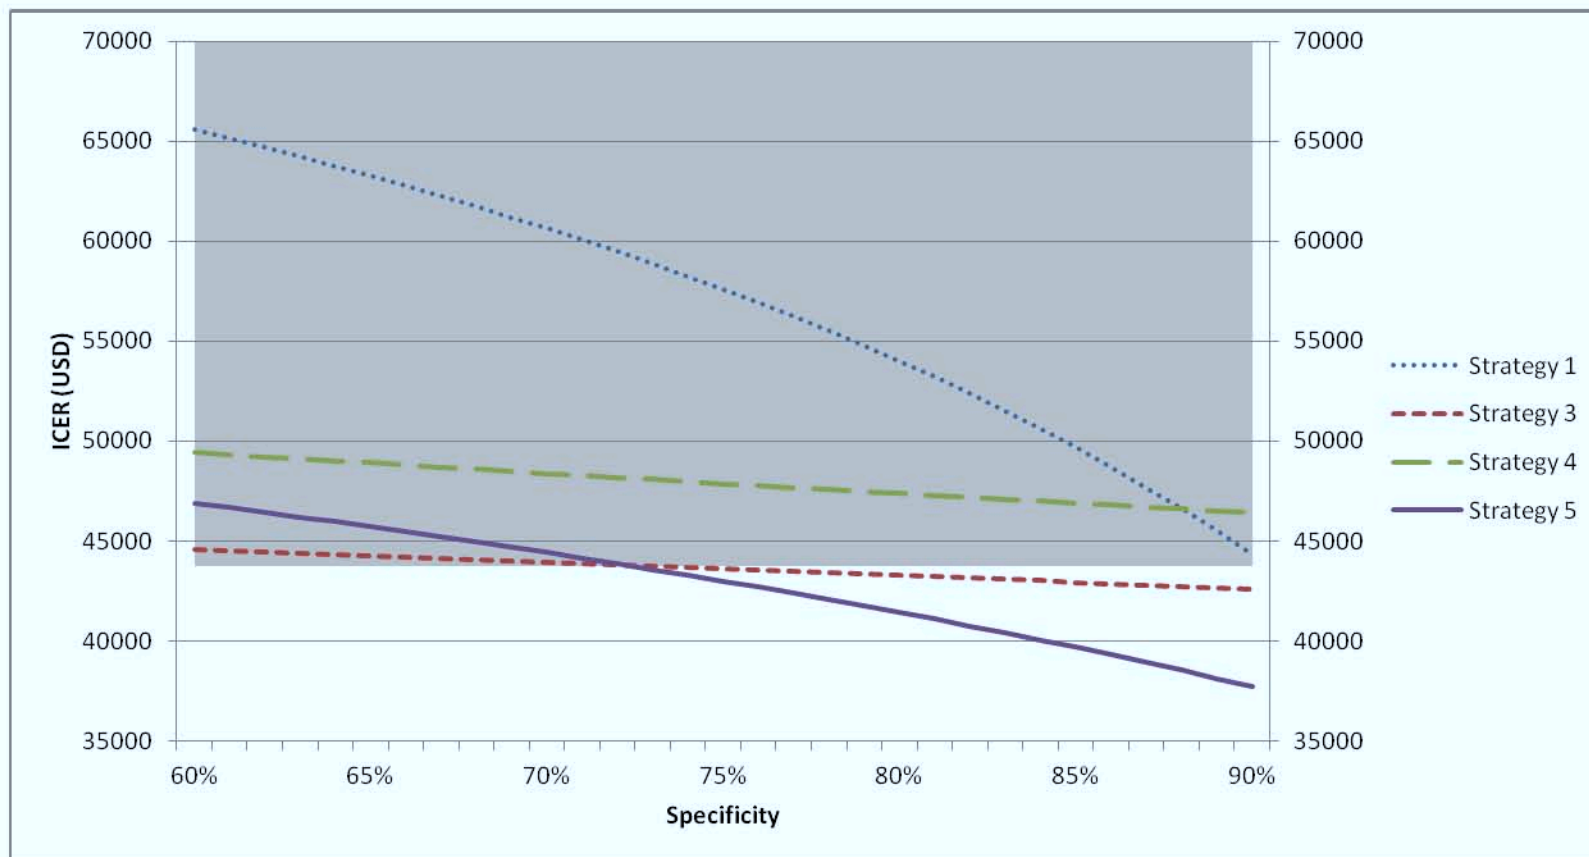

ICER: Incremental Cost-Effectiveness Analysis. Strategy 1: Both male and female subjects received flexible sigmoidoscopy (FS) every 5 years (50, 55, 60, 65 and 70 years); Strategy 2: both male and female subjects received colonoscopy every 10 years (50, 60, 70 years); Strategy 3: FS for each woman at 50 and 55 year-old followed by colonoscopy at 60 and 70 year-old; male subjects received colonoscopy at 50, 60 and 70 year-old; Strategy 4: FS for each woman at 50, 55, 60 and 65 year-old followed by colonoscopy at 70 year-old; male subjects received colonoscopy at 50, 60 and 70 year-old; Strategy 5: FS for each woman at 50, 55, 60, 65 and 70 year-old; male subjects received colonoscopy at 50, 60 and 70 year-old

**Supplementary Figure 1c One-way sensitivity analysis on the cost of colonoscopy**

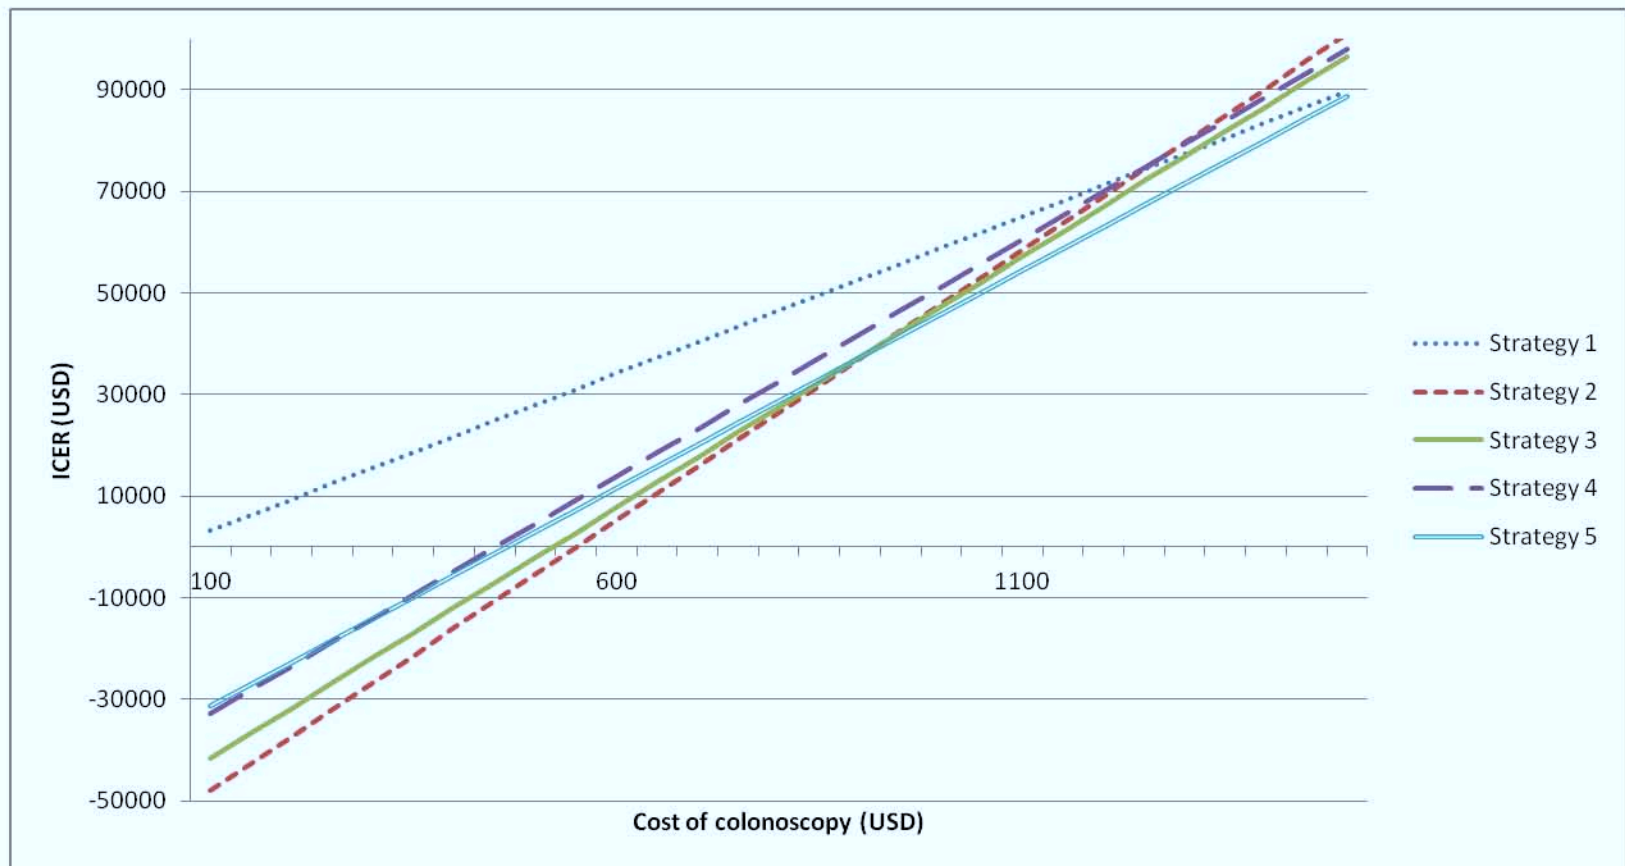

ICER: Incremental Cost-Effectiveness Analysis. Strategy 1: Both male and female subjects received flexible sigmoidoscopy (FS) every 5 years (50, 55, 60, 65 and 70 years); Strategy 2: both male and female subjects received colonoscopy every 10 years (50, 60, 70 years); Strategy 3: FS for each woman at 50 and 55 year-old followed by colonoscopy at 60 and 70 year-old; male subjects received colonoscopy at 50, 60 and 70 year-old; Strategy 4: FS for each woman at 50, 55, 60 and 65 year-old followed by colonoscopy at 70 year-old; male subjects received colonoscopy at 50, 60 and 70 year-old; Strategy 5: FS for each woman at 50, 55, 60, 65 and 70 year-old; male subjects received colonoscopy at 50, 60 and 70 year-old

**Supplementary Figure 1d One-way sensitivity analysis on the cost of flexible sigmoidoscopy**

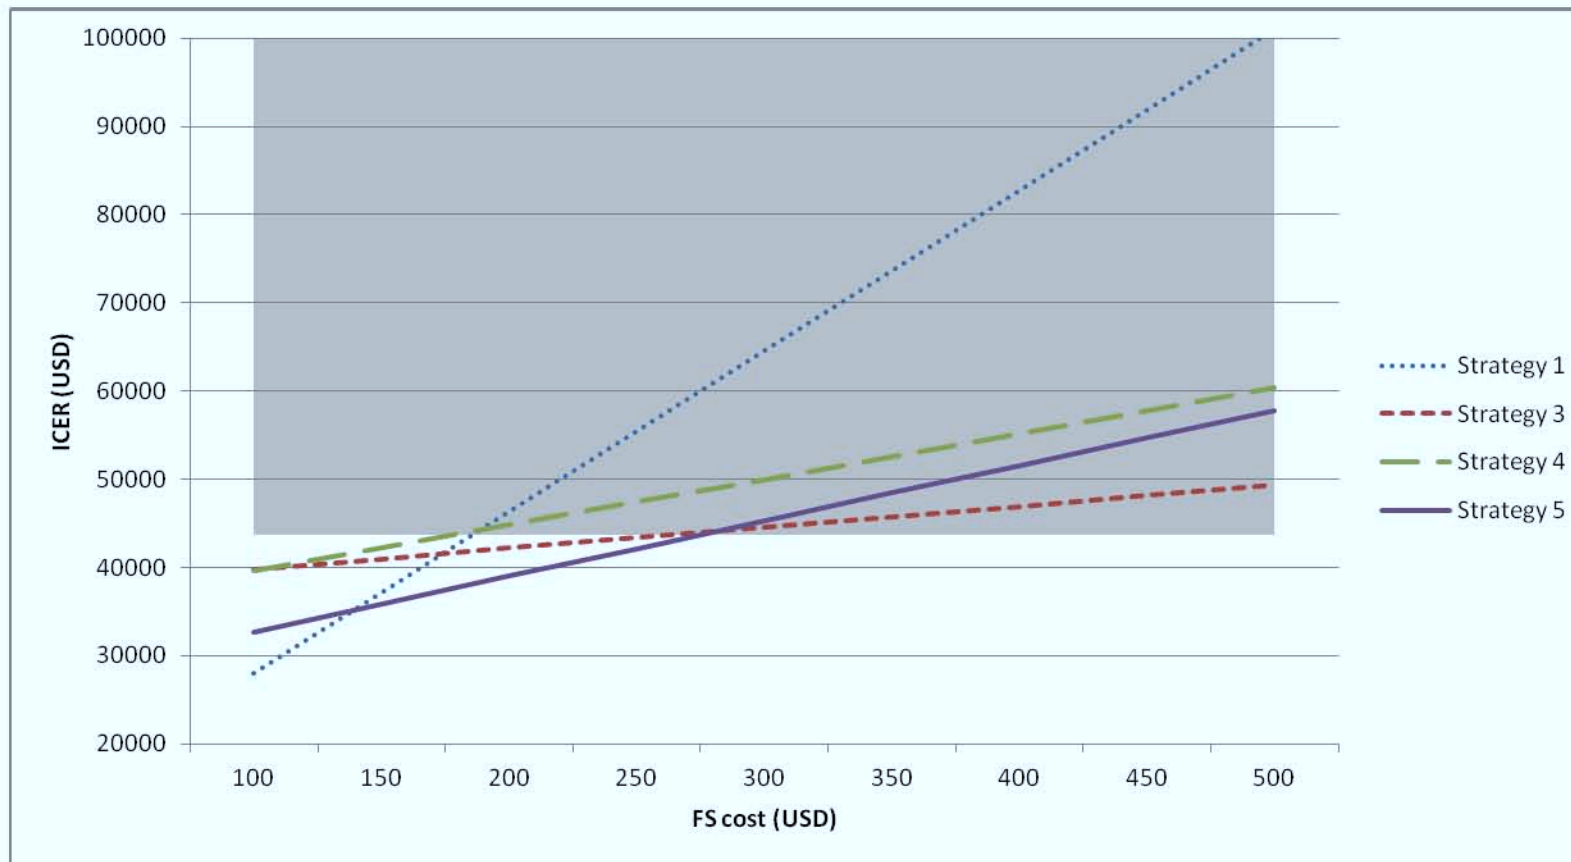

ICER: Incremental Cost-Effectiveness Analysis. Strategy 1: Both male and female subjects received flexible sigmoidoscopy (FS) every 5 years (50, 55, 60, 65 and 70 years); Strategy 2: both male and female subjects received colonoscopy every 10 years (50, 60, 70 years); Strategy 3: FS for each woman at 50 and 55 year-old followed by colonoscopy at 60 and 70 year-old; male subjects received colonoscopy at 50, 60 and 70 year-old; Strategy 4: FS for each woman at 50, 55, 60 and 65 year-old followed by colonoscopy at 70 year-old; male subjects received colonoscopy at 50, 60 and 70 year-old; Strategy 5: FS for each woman at 50, 55, 60, 65 and 70 year-old; male subjects received colonoscopy at 50, 60 and 70 year-old.
